# Supplementary material for: A Model Eumelanin from 5,6-Dihydroxyindole-2-Carboxybutanamide Combining Remarkable Antioxidant and Photoprotective Properties with a Favourable Solubility Profile for Dermo-Cosmetic Applications
Source: MDPI journal article supplement (doi:10.3390/ijms24044241), 2023-02-20
Supplement: s1 [file s1]

## Supporting Information

### A Model Eumelanin from 5,6-Dihydroxyindole-2-Carboxybutanamide Combining Remarkable Antioxidant and Photoprotective Properties with a Favourable Solubility Profile for Dermo-Cosmetic Applications

| Table of contents                                                                                                                                                                                                                                                 |       |
|-------------------------------------------------------------------------------------------------------------------------------------------------------------------------------------------------------------------------------------------------------------------|-------|
| <b>Figure S1.</b> HPLC profile of acetylated ADHICA oxidation mixture in the presence of Cu <sup>2+</sup> .                                                                                                                                                       | p. 1  |
| <b>Figure S2.</b> HPLC profile of the main product of copper assisted ADHICA oxidation after purification by preparative HPLC.                                                                                                                                    | p. 2  |
| <b>Figure S3.</b> <sup>1</sup> H-NMR spectrum of acetylated ADHICA 4,4'-dimer (DMSO-d <sub>6</sub> ).                                                                                                                                                             | p. 3  |
| <b>Figure S4.</b> <sup>13</sup> C-NMR spectrum of acetylated ADHICA 4,4'-dimer (DMSO-d <sub>6</sub> ).                                                                                                                                                            | p. 4  |
| <b>Figure S5.</b> UV-Vis spectra of the aerobic oxidation mixture of 1 mM ADHICA in carbonate buffer at pH 9.0 at different reaction times                                                                                                                        | p. 5  |
| <b>Figure S6.</b> a) Solid state EPR spectra and b) power saturation profiles of DHICA and ADHICA melanin.                                                                                                                                                        | p. 6  |
| <b>Figure S7.</b> FTIR-ATR spectra of <b>ADHICA</b> (red line) and <b>DHICA</b> (black line) melanin.                                                                                                                                                             | p. 7  |
| <b>Figure S8.</b> UV-Vis spectrum of ADHICA and DHICA melanins at 0.01 mg/mL in methanol.                                                                                                                                                                         | p. 8  |
| <b>Figure S9.</b> HPLC profile of the ADHICA melanin at 1mg/mL in DMSO. Detection wavelength at 300 nm.                                                                                                                                                           | p. 9  |
| <b>Figure S10.</b> Absorbance versus concentration plots for ADHICA melanin in various solvents. Correlation coefficients for linearity fitting among different data points <b>Orange line</b> (R <sup>2</sup> > 0.99), <b>Blue line</b> (R <sup>2</sup> < 0.99). | p. 10 |

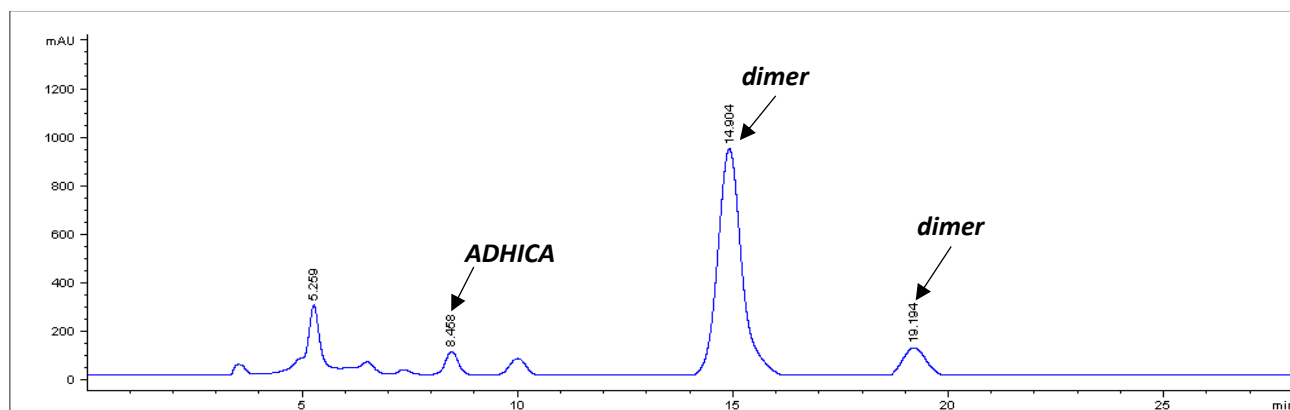

**Figure S1.** HPLC profile of acetylated ADHICA oxidation mixture in the presence of  $\text{Cu}^{2+}$ .

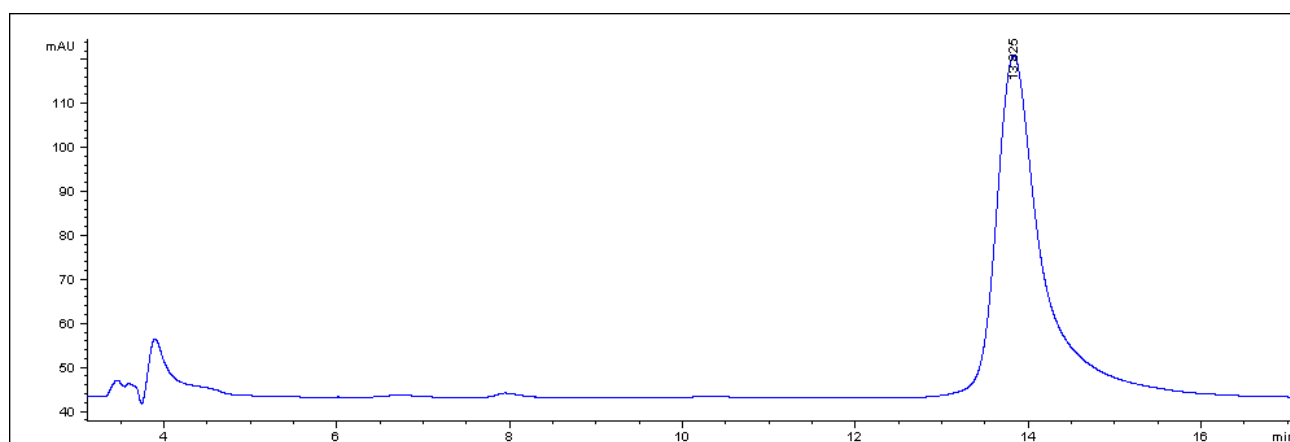

**Figure S2.** HPLC profile of the main product of ADHICA oxidation after purification by preparative HPLC.

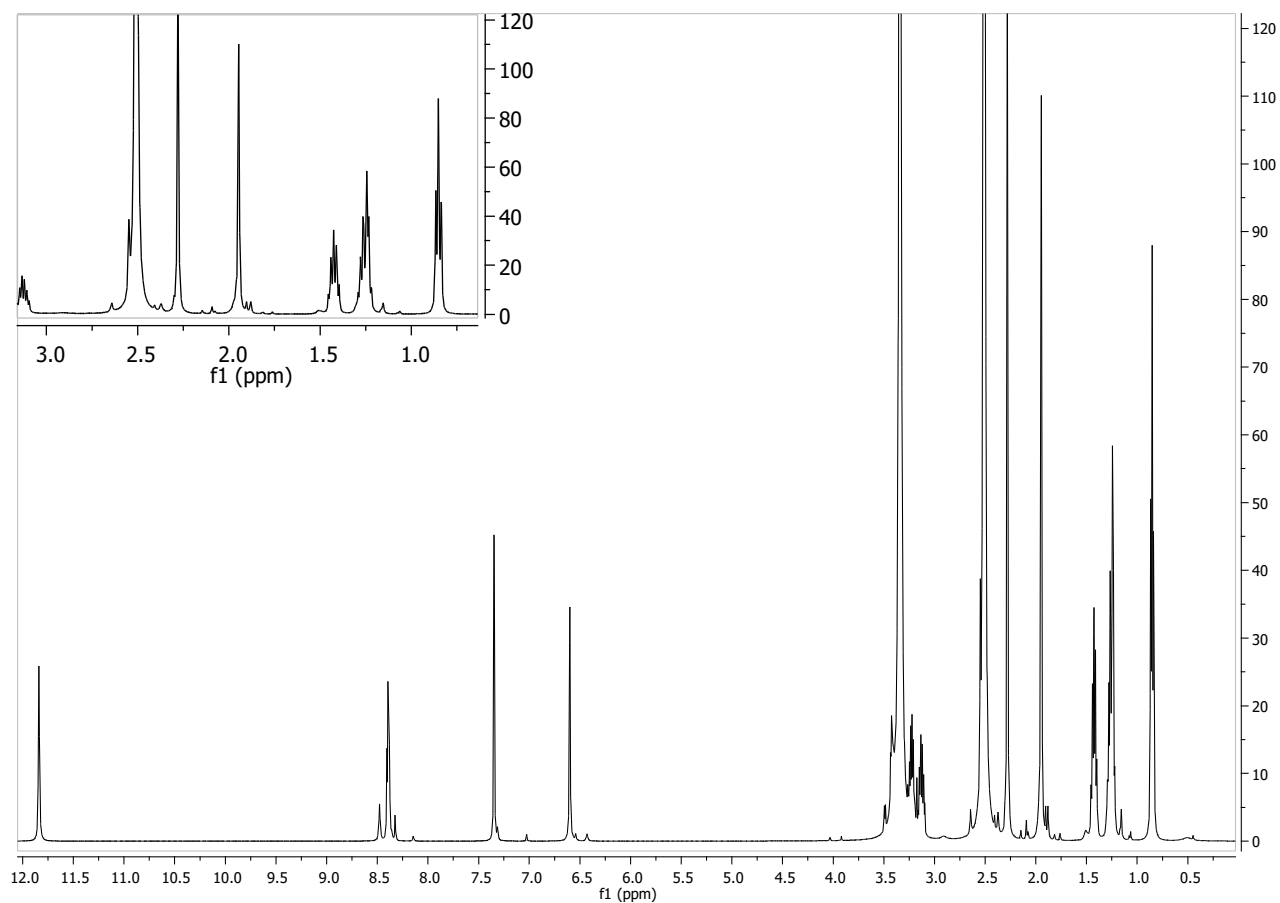

**Figure S3.**  $^1\text{H}$ -NMR spectrum of acetylated ADHICA 4,4-dimer ( $\text{DMSO-d}_6$ ).

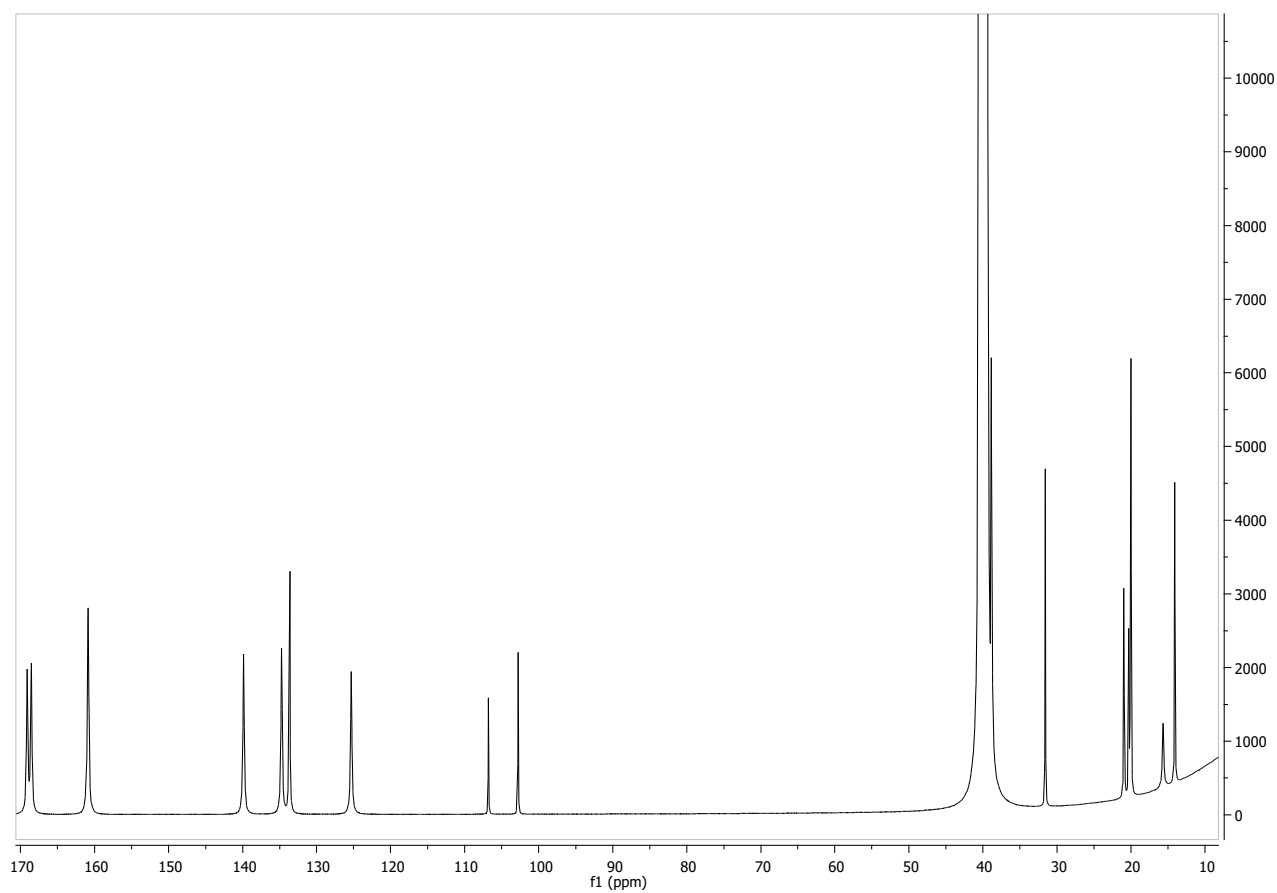

**Figure S4.**  $^{13}\text{C}$ -NMR spectrum of acetylated ADHICA 4,4'-dimer ( $\text{DMSO}-d_6$ ).

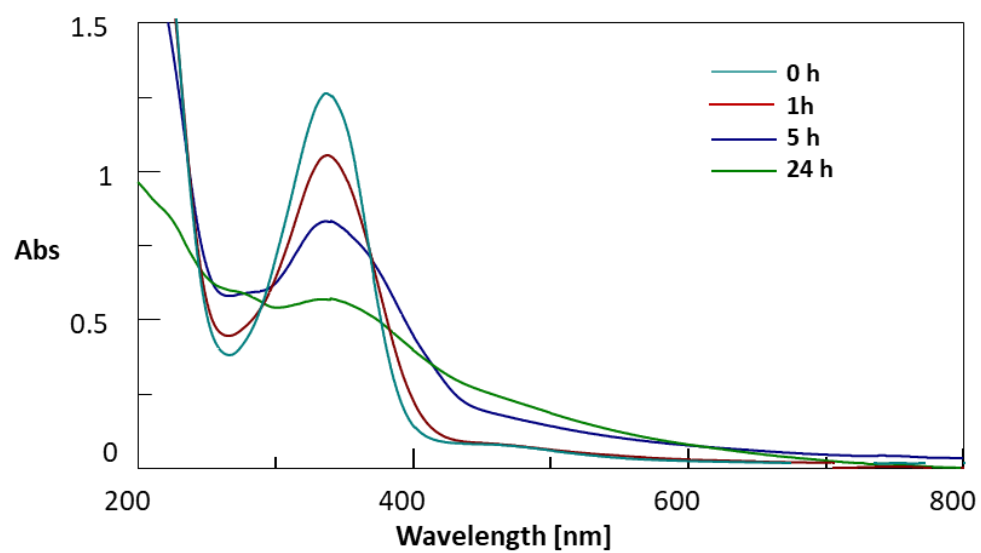

**Figure S5.** UV-Vis spectra of the aerobic oxidation mixture of 1 mM ADHICA in carbonate buffer at pH 9.0 at different reaction times.

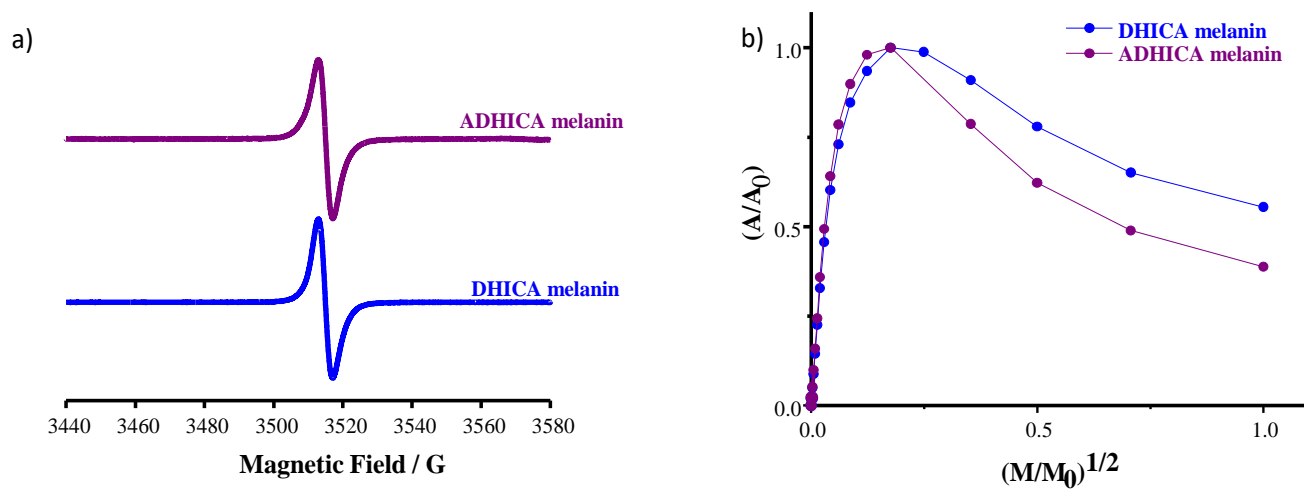

**Figure S6.** a) Solid state EPR spectra and b) power saturation profiles of DHICA and ADHICA melanin.

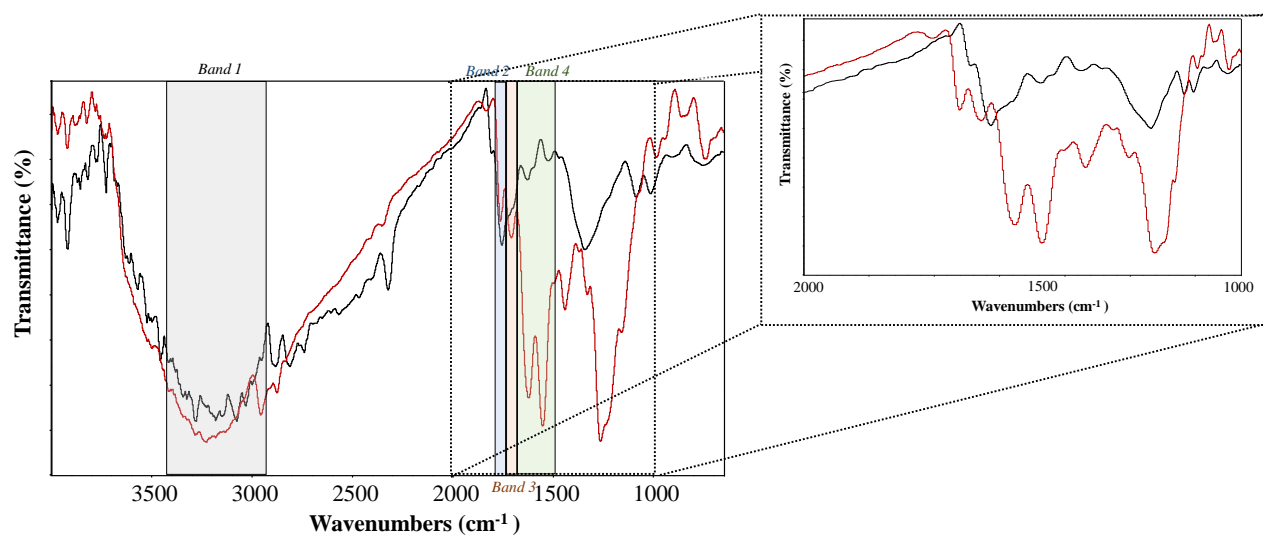

**Figure S7.** FTIR-ATR spectra of **ADHICA** (red line) and **DHICA** (black line) melanin.



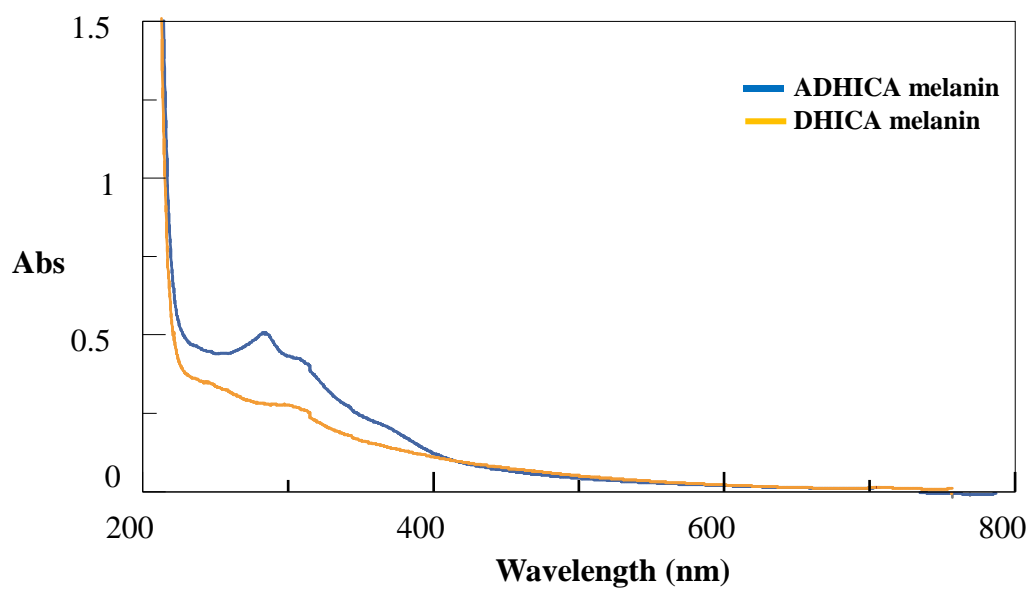

**Figure S8.** UV-Vis spectrum of ADHICA and DHICA melanin at 0.01 mg/mL in methanol.

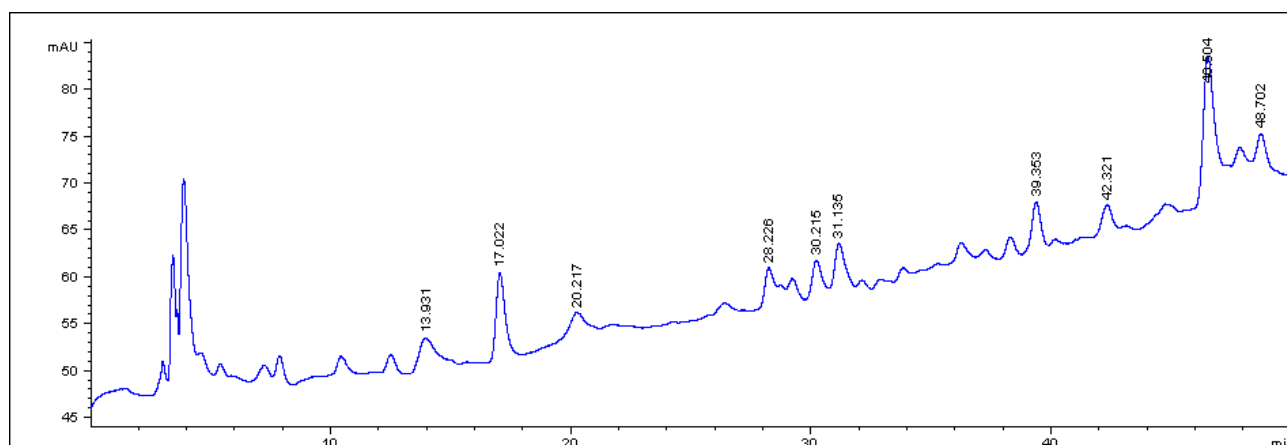

**Figure S9.** HPLC profile of the ADHICA melanin at 1mg/mL in DMSO. Detection wavelength at 300 nm.

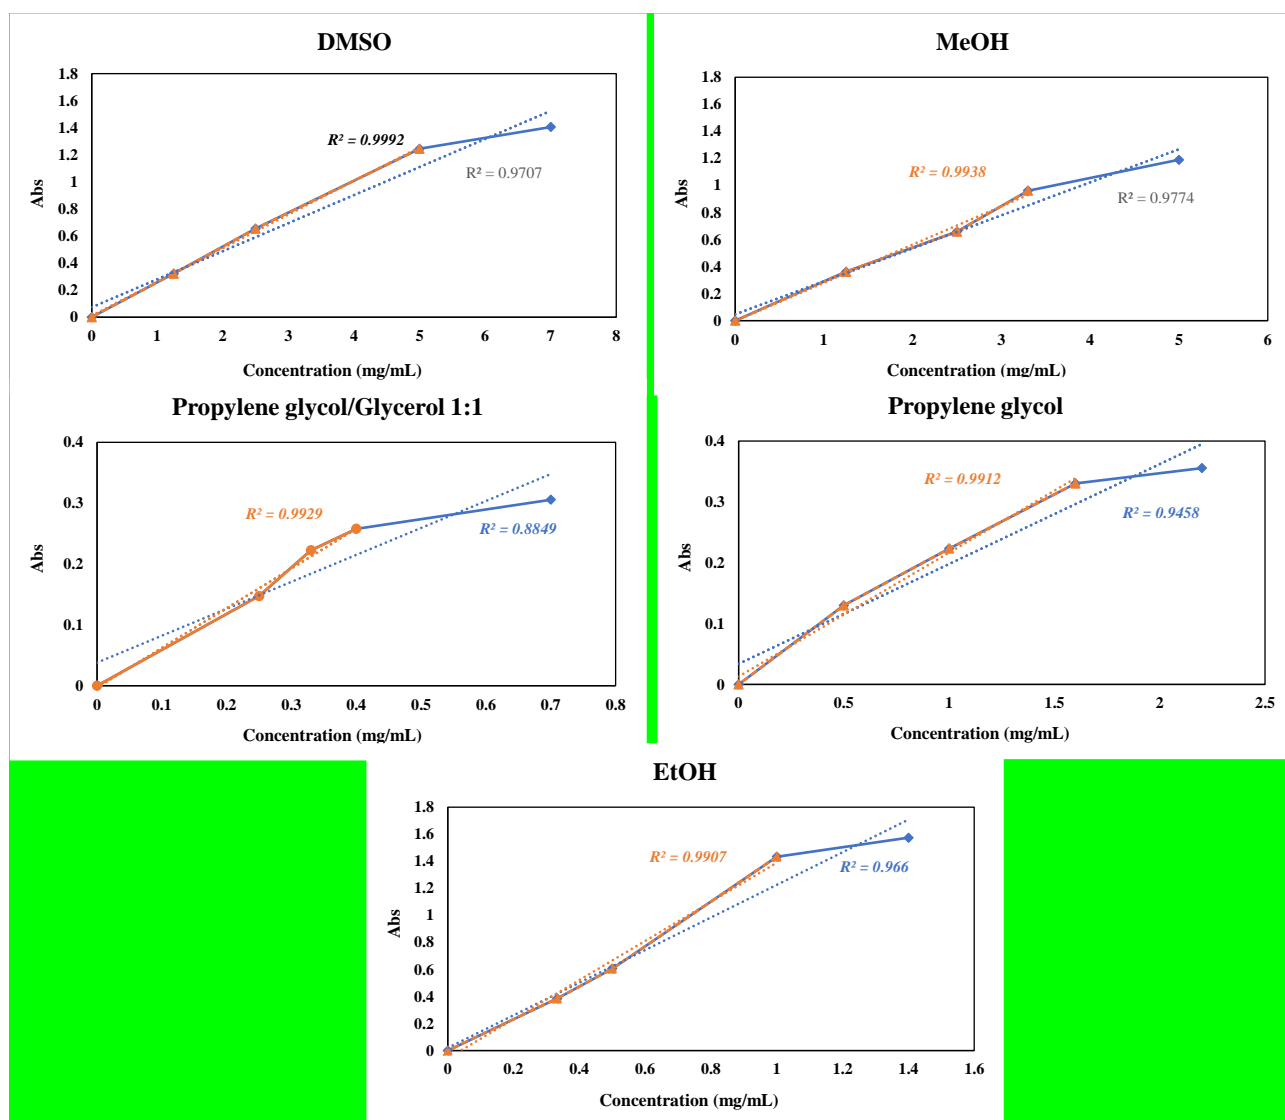

**Figure S10.** Absorbance versus concentration plots for ADHICA melanin in various solvents. Correlation coefficients for linearity fitting among different data points **Orange line** ( $R^2 > 0.99$ ), **Blue line** ( $R^2 < 0.99$ ).
